# Supplementary material for: Association between BDNF levels and suicidal behaviour: a systematic review protocol
Source: PubMed Central journal article supplement (PMC4410596; doi:10.1186/s13643-015-0047-x), 2015-04-24

Figure 1: PRISMA Flow Diagram

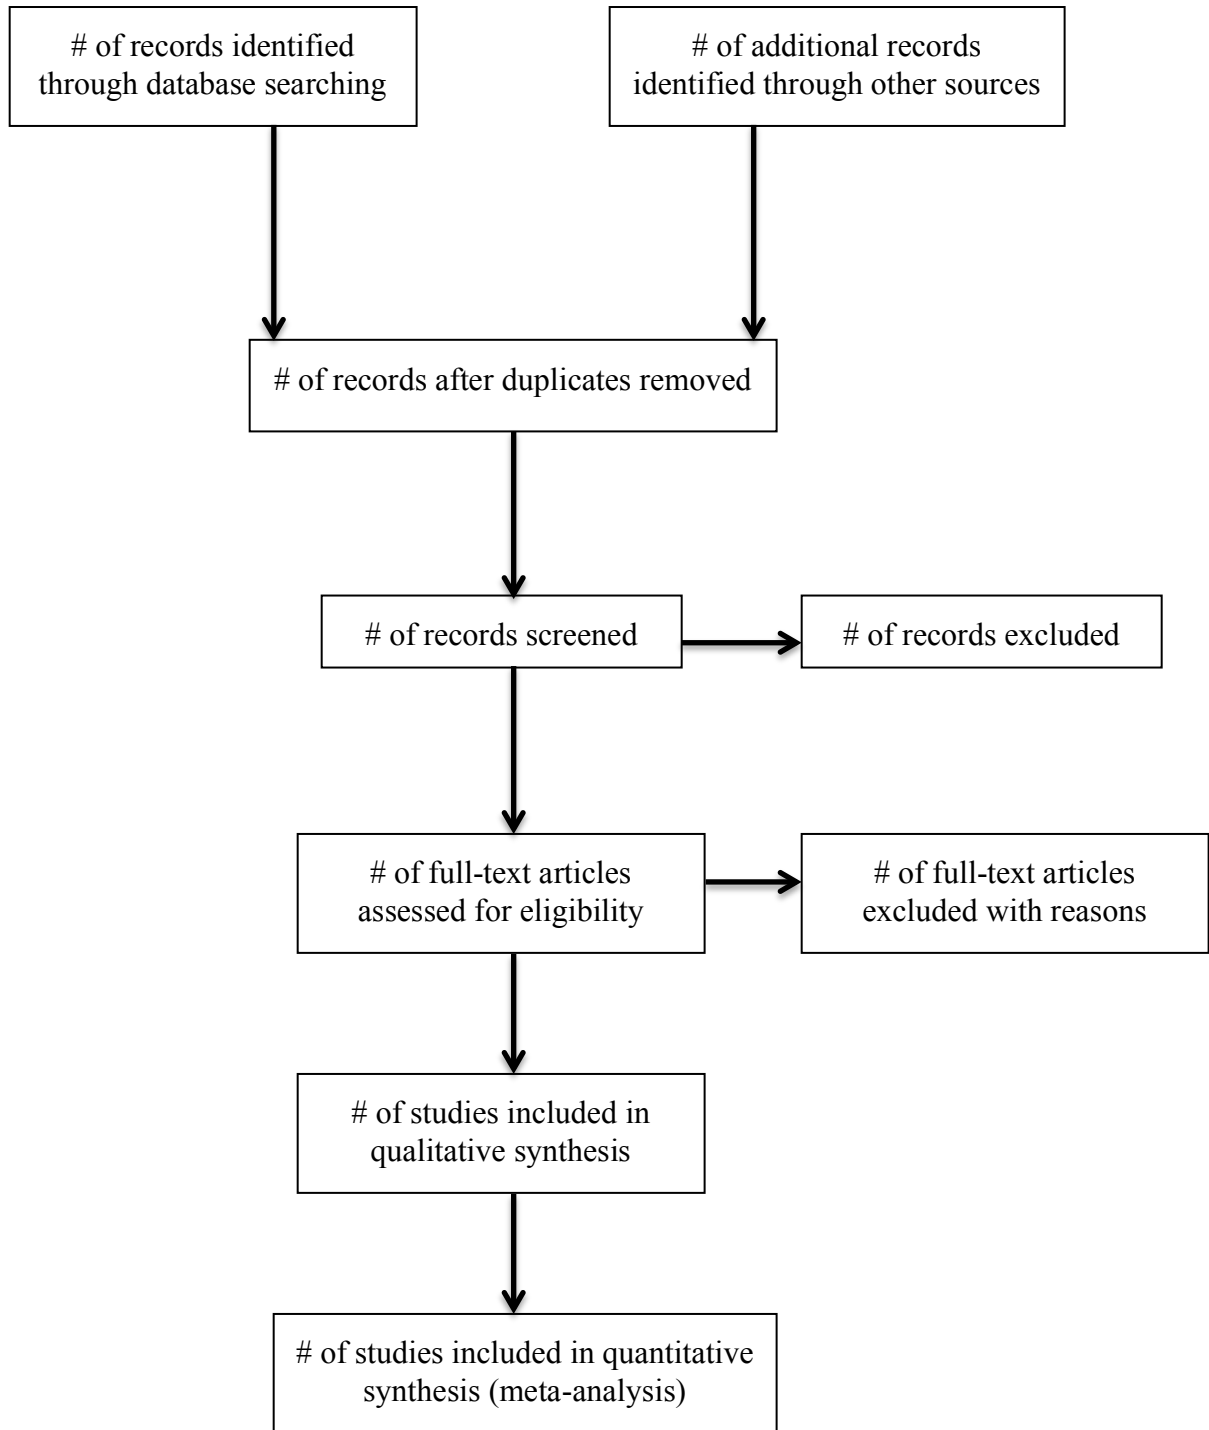

Supplement: 13643_2015_47_MOESM1_ESM.pdf [file 13643_2015_47_MOESM1_ESM.pdf]
