# Supplementary material for: Association between BDNF levels and suicidal behaviour: a systematic review protocol
Source: PubMed Central journal article supplement (PMC4410596; doi:10.1186/s13643-015-0047-x), 2015-04-24
Supplement: 13643_2015_47_MOESM2_ESM.pdf [file 13643_2015_47_MOESM2_ESM.pdf]

**Data Extraction Form**

**Association Between BDNF Levels and Suicidal Behaviour: A Systematic Review**

Study ID: \_\_\_\_\_ Reviewer Initials: \_\_\_\_\_

**STUDY INFORMATION**

Last Name of First Author, Initial: \_\_\_\_\_ Year of Publication \_\_\_\_\_

Title of Article: \_\_\_\_\_

Journal Name: \_\_\_\_\_ City, Country: \_\_\_\_\_

**METHODS**

Study Setting: \_\_\_\_\_ Study Design: \_\_\_\_\_

Description of sample and comparison groups:

Sample Size: Total \_\_\_\_\_, Men \_\_\_\_\_, Women \_\_\_\_\_  
Per group \_\_\_\_\_

Mean Age (SD): Total \_\_\_\_\_, Men \_\_\_\_\_, Women \_\_\_\_\_  
Per group \_\_\_\_\_

Ethnicity: \_\_\_\_\_

**RESULTS**

Definition of suicidal behaviour: \_\_\_\_\_

Type of BDNF sample: \_\_\_\_\_ Lab analysis method: \_\_\_\_\_

Mean (SD) and unit of measurement of BDNF in each group:

Outcome measures: \_\_\_\_\_

Number of individuals experiencing the event: Completed suicide \_\_\_\_\_,  
Attempted suicide \_\_\_\_\_, Suicidal ideation \_\_\_\_\_, Other \_\_\_\_\_

Statistical Methods: \_\_\_\_\_

Adjusted for: \_\_\_\_\_

Statistical Results: Coefficient \_\_\_\_\_, 95% CI \_\_\_\_\_ p-value \_\_\_\_\_

Findings: \_\_\_\_\_

Limitations: \_\_\_\_\_

**INCLUSION CRITERIA**

The study examines the association between BDNF levels and risk of suicidal behaviour

Study participants are  $\geq 18$  years of age

Study participants are human

Study has been completed and published

**EXCLUSION CRITERIA**

Includes children or adolescents

Animal study

Incomplete study

Abstract, commentary, or review

**COMMENTS**

---

---
