# Supplementary material for: Association between BDNF levels and suicidal behaviour: a systematic review protocol
Source: Syst Rev. 2015 Apr 24;4:56. doi: 10.1186/s13643-015-0047-x (PMC4410596; doi:10.1186/s13643-015-0047-x)
Supplement: Additional file 3: — Modified NOS. [file 13643_2015_47_MOESM3_ESM.pdf]

## **Modified Newcastle-Ottawa Scale (NOS)**

### Legend

|                                       |
|---------------------------------------|
| 0 = Definitely no (high risk of bias) |
| 1 = Mostly no                         |
| 2 = Mostly yes                        |
| 3 = Definitely yes (low risk of bias) |

Domain of evaluation: Methods for selecting study participants (i.e. Selection bias)

**Is the source population (cases, controls, cohorts) appropriate and representative of the population of interest?**

0 1 2 3  
(high risk of bias) (low risk of bias)

Example of low risk of bias: A consecutive sample or random selection from a population that is representative of the condition under study.

Example of moderate risk of bias: A consecutive sample or random selection from a population that is not highly representative of the condition under study.

Example of high risk of bias: The source population cannot be defined or enumerated (e.g. volunteering or self-recruitment).

Domain of evaluation: Methods to control confounding (i.e. Performance bias)

**Is the sample size adequate and is there sufficient power to detect a meaningful difference in the outcome of interest?**

0 1 2 3  
(high risk of bias) (low risk of bias)

Example of low risk of bias: Sample size was adequate and there was sufficient power to detect a difference in the outcome.

Example of high risk of bias: Sample size was small and there was not enough power to test outcome of interest.

**Did the study identify and adjust for any variables or confounders that may influence the outcome?**

0 1 2 3  
(high risk of bias) (low risk of bias)

Example of low risk of bias: The study identified and adjusted for all possible confounders that may influence estimates of association between exposure and outcome.

Example of moderate risk of bias: The study identified and reported possible variables that may influence the outcome but did not explore the interaction.

Example of high risk of bias: The study either did not report any variables of influence or acknowledge variables of influence when it was clear they were present

|                                                                 |
|-----------------------------------------------------------------|
| Domain of evaluation: Statistical methods (i.e. Detection bias) |
|-----------------------------------------------------------------|

**Did the study use appropriate statistical analysis methods relative to the outcome of interest?**

0 1 2 3  
(high risk of bias) (low risk of bias)

Example of low risk of bias: The study reported use of appropriate statistical analysis as required.

Example of moderate risk of bias: The study either used correct statistical methods but did not report them well, or used incorrect methods but reported them in detail.

Example of high risk of bias: The study did not use appropriate statistical analysis as required or did not report them adequately.

**Is there little missing data and did the study handle it accordingly?**

0 1 2 3  
(high risk of bias) (low risk of bias)

Example of low risk of bias: The study acknowledged missing data to be less than 10% and specified the method of handling it.

Example of moderate risk of bias: The study had greater than 15% but they specified the method they used to handle it.

Example of high risk of bias: The study had greater than 15% missing data and did not handle it at all.

|                                                                                       |
|---------------------------------------------------------------------------------------|
| Domain of evaluation: Methods for measuring outcome variables (i.e. Information bias) |
|---------------------------------------------------------------------------------------|

**Is the methodology of the outcome measurement explicitly stated and is it appropriate?**

|                     |   |   |                    |
|---------------------|---|---|--------------------|
| 0                   | 1 | 2 | 3                  |
| (high risk of bias) |   |   | (low risk of bias) |

Example of low risk of bias: The study provides a detailed description of the outcome measure(s) which are appropriate for the outcome of interest.

Example of moderate risk of bias: The study provides a somewhat complete description of outcome measurements and they are justified.

Example of high risk of bias: The study provides limited information on the methods of measuring the outcome and the measure is not appropriate considering the outcome.

**Is there an objective assessment of the outcome of interest?**

|                     |   |   |                    |
|---------------------|---|---|--------------------|
| 0                   | 1 | 2 | 3                  |
| (high risk of bias) |   |   | (low risk of bias) |

Example of low risk of bias: The study used objective methods to discern the outcome status of participants (e.g. laboratory measurements, medical records).

Example of moderate risk of bias: The study relied on subjective data as the primary method to discern outcome status of participants (e.g. self report).

Example of high risk of bias: The study had limited reporting about assessment of outcomes.
